# Supplementary material
Source: HighWire-hosted journal article supplement (https://bmjopen.bmj.com/content/7/5/e013780)
Supplement: inline-supplementary-material-2 [file inline-supplementary-material-2.pdf]

APPENDIX 2: Data Extraction Form (PILOT form)

Publication Details

Author \_\_\_\_\_ Journal of publication \_\_\_\_\_ Year of publication \_\_\_\_\_;

Study Design

Time period of study \_\_\_\_\_ Study location(s) \_\_\_\_\_

Database(s) used \_\_\_\_\_

Type of study: Cohort Y N If Yes, with control? Y N Case control Y N  
Other \_\_\_\_\_

Procedure(s)

Knee Replacement \_\_ Hip Replacement\_\_ Appendectomy\_\_  
Cholecystectomy\_\_ Esophagectomy\_\_ Pancreatectomy\_\_  
AAA Repair\_\_ CABG\_\_ Aortic Valve Replacement\_\_

Population descriptors

Sub Group i

Age range of patients \_\_\_\_\_ Gender/sex \_\_\_\_\_

Patient Characteristics \_\_\_\_\_

Sub Group ii

Age range of patients \_\_\_\_\_ Gender/sex \_\_\_\_\_

Patient Characteristics \_\_\_\_\_

Risk Adjustments \_\_\_\_\_

Outcomes

|              | Reported Value | Unit of Measure | Number of events | Denominator Patients | Denominator Time | Other |
|--------------|----------------|-----------------|------------------|----------------------|------------------|-------|
| A. Outcome:  |                |                 |                  |                      |                  |       |
| Subgroup i:  |                |                 |                  |                      |                  |       |
| Subgroup ii: |                |                 |                  |                      |                  |       |
| B. Outcome:  |                |                 |                  |                      |                  |       |
| Subgroup i:  |                |                 |                  |                      |                  |       |
| Subgroup ii: |                |                 |                  |                      |                  |       |
| C. Outcome:  |                |                 |                  |                      |                  |       |
| Subgroup i:  |                |                 |                  |                      |                  |       |
| Subgroup ii: |                |                 |                  |                      |                  |       |
| D. Outcome:  |                |                 |                  |                      |                  |       |
| Subgroup i:  |                |                 |                  |                      |                  |       |
| Subgroup ii: |                |                 |                  |                      |                  |       |

#### RATES

|              | Cumulative Incidence | Incidence Rate | Prevalence | Occurrence Rate |
|--------------|----------------------|----------------|------------|-----------------|
| A. Outcome:  |                      |                |            |                 |
| Subgroup i:  |                      |                |            |                 |
| Subgroup ii: |                      |                |            |                 |
| B. Outcome:  |                      |                |            |                 |
| Subgroup i:  |                      |                |            |                 |
| Subgroup ii: |                      |                |            |                 |
| C. Outcome:  |                      |                |            |                 |

|              |  |  |  |  |
|--------------|--|--|--|--|
| Subgroup i:  |  |  |  |  |
| Subgroup ii: |  |  |  |  |
| D. Outcome:  |  |  |  |  |
| Subgroup i:  |  |  |  |  |
| Subgroup ii: |  |  |  |  |

Cumulative Incidence: **Number of new presentations of the complication during the hospitalization/Total population at risk** (Where the total population at risk will be defined as the number of hospitalized patients who have undergone the target procedure).

Incidence Rate: **Number of new presentations of the complication during the hospitalization/Total person-time at risk** (Where the person-time will be the sum of the total length of hospitalization for all patients undergoing the target procedure).

Prevalence: **Number of existing cases of the complication at a specific point in time/The total population of patients who have undergone the target procedure**

Occurrence Rate: **Number of cases of the complication during hospitalization/Total number of patients undergoing the target procedure during the same time frame.**

**Other Comments:**
